# Supplementary material for: Inconsistent experiment design leads to systematic bias across the literature on daytime radiative cooling
Source: Research Square preprint supplement (doi:10.21203/rs.3.rs-7738475/v2), 2025-10-02
Supplement: Supplementary file 1 [file 3b516219486b0346d604322f.docx]

# Supplementary information

**Inconsistent experiment design leads to systematic bias across the literature on daytime radiative cooling**

Teng Xionga, Ziao Zhenga, b, Hassan Saeed Khana, c, Ioannis Kousisa, Olivia Marie Lucie Juliaa, d, Djordje Krajcice, Gianluca Ranzie, Mattheos Santamourisa, f, Riccardo Paolinia*

a School of Built Environment, Faculty of Arts, Design and Architecture, University of New South Wales, UNSW Sydney, Australia

b Institute of Refrigeration and Cryogenics, Shanghai Jiao Tong University, Shanghai, 200240, China

c School of Engineering and Technology, Central Queensland University, Sydney, Australia

d Renewable Energy Cluster ENAC, School of Architecture, Civil and Environmental Engineering, EPFL, Lausanne, Switzerland

e School of Civil Engineering, The University of Sydney, Sydney, Australia

f Anita Lawrence Chair in High Performance Architecture. School of Built Environment, University of New South Wales, Sydney, Australia

* Corresponding Author: A/Prof Riccardo Paolini: [r.paolini@unsw.edu.au](mailto:r.paolini@unsw.edu.au)

This supplementary information contains the following sections:

Supplementary Tables 1–5

Supplementary Figs. 1–16

Supplementary Notes 1–8

**Supplementary Table 1** Literature review on outdoor testing of PDRCs.

| **PDRCs** | ***R*solar** | ***ε*LWIR** | **Location** | **Sample size (mm)** | **Sensor** | **Experimental setup** | **Main result** | **Ref** |
| --- | --- | --- | --- | --- | --- | --- | --- | --- |
| SiO2/Ag/SiO2  thickness: 500 µm | 0.96 | 0.85 | Beijing, China | Ø101.6 | T-type thermocouple | Foam + PE film | Average ∆*T* of 5.9 °C under a solar intensity of 550–950 W/m2 | 1 |
| PDMS/Al  thickness: 150 µm | 0.92 | 0.95 | Hong Kong, China | Ø100 | T-type thermocouple | Foam | ∆*T* high than 1.0 °C under a solar intensity of 760 W/m2 | 2 |
| PDMS/Al  thickness: 150 µm | 0.92 | 0.95 | Buffalo, USA | 260×260 | K-type thermocouple | Foam + PE film + solar shield | Maximum ∆*T* of 6.2 °C | 3 |
| LiF/Ag  thickness: 1 mm | 0.95 | 0.95 | Tempe, USA | Ø40 | thermistor | Air cavity + PE film + enclosure | ∆*T* of 5 °C under solar intensity of 900 W/m2 | 4 |
| Si3N4/Si/Al  thickness: 920 nm | / | / | Stanford, USA | Ø100 | K-type thermocouple | Air cavity + ZnSe cover + vacuum chamber + radiation shield + solar shield + mirror cone | Maximum ∆*T* of 42.2 °C under a solar intensity of 500 W/m2 | 5 |
| ESR  thickness: | 0.98 | 0.79 | Singapore | Ø65 | K-type thermocouple | Air cavity + Ge cover + vacuum chamber + radiation shield + mirror cone | Maximum ∆*T* of 8 °C under a cloudy sky | 6 |
| PET/Ag  thickness: 50 µm | 0.95 | 0.96 | Weihai, China | 100×100 | thermocouple | Foam + PE film + enclosure | ∆*T* of 7 °C under solar intensity of 760 W/m2 | 7 |
| PMSQ + SiO2/ESR  thickness: 2 µm | 0.97 | 0.89 | Sarriguren, Spain | 200×200 | K-type thermocouple | Foam | Average ∆*T* of 2.7 °C during 12:00–15:00 | 8 |
| SiO2 + BaSO4/PVDF  thickness: 100 µm | 0.95 | 0.96 | Weihai, China | 90×90 | K-type thermocouple | Air cavity + enclosure | Average ∆*T* of 5.9 °C under solar intensity of 803 W/m2 | 9 |
| SiO2@Willemite/PMMA  thickness: 260 µm | 0.96 | 0.94 | Nanjing, China | 100×100 | K-type thermocouple | Foam + PE film | Average ∆*T* of 4.1 °C under solar intensity of 800–950 W/m2 | 10 |
| BaSO4/P(VdF-HFP)  thickness: 700 µm | 0.97 | 0.94 | Singapore | Ø56.4 | K-type thermocouple | Foam | Average ∆*T* of 1.5 °C under solar intensity of 1000 W/m2 | 11 |
| POM-PTFE-Al  thickness: 150 µm | 0.95 | 0.83 | Ulan Buh Desert, China | 100×100 | K-type thermocouple | Foam + PE film | Average ∆*T* of 8.7 °C under solar intensity of 700–900 W/m2 | 12 |
| 3DPCA/SiO2  thickness: 150 µm | 0.96 | 0.95 | Nanjing,  China | Ø150 | thermocouple | Foam | Average ∆*T* of 6.2 °C under solar intensity of 900 W/m2 | 13 |
| Al2O3 + SiO2/DPHA  Thickness: 250 µm | 0.94 | 0.94 | Seoul, South Korea | 50×50 | K-type thermocouple | Foam + PE film + enclosure | Average ∆*T* of 5.6 °C during 11:00–13:00 | 14 |
| P(VdF-HFP)HP  thickness: 300 µm | 0.96 | 0.97 | Phoenix, USA | 150×150 | thermocouple | Foam + radiation shield | Maximum ∆*T* of 6 °C under solar intensity of 890 W/m2 | 15 |
| P(VdF-HFP)HP  thickness: 300 µm | 0.96 | 0.97 | Sanya, China | 100×100 | K-type thermocouple | Foam + PE film | Maximum ∆*T* of 6.5 °C under solar intensity of 750 W/m2 | 16 |
| P-PDMS  thickness: 450 µm | 0.95 | 0.96 | Hangzhou, China | 50×50 | thermocouple | Foam + PE film | Average ∆*T* of 8 °C under solar intensity of 550–1000W/m2 | 17 |
| S-P-PDMS  thickness: 2.5 mm | 0.95 | 0.93 | Xi’an, China | Ø40 | thermocouple | Foam + PE film | Average ∆*T* of 11.5 °C under solar intensity of 400–800 W/m2 | 18 |
| PEA/ESR  thickness: 12 mm | 0.92 | 0.89 | San Pedro de Atacama, Chile | Ø100 | T-type thermocouple | Foam | ∆*T* of 13 °C under solar intensity of 1123 W/m2 | 19 |
| PMMAHPA  thickness: 160 µm | 0.95 | 0.98 | Shanghai, China | 100×100 | thermometer | Foam + PE film | Average ∆*T* of 6 °C during 11:00–14:00 | 20 |
| PE aerogel/PDMS  thickness: 2.7 mm | 0.96 | 0.79 | Beijing, China | 130×130 | Pt100 | Foam + solar shield | ∆*T* of 5–6 °C under solar intensity of 1000 W/m2 | 21 |
| SiO2/HfO2/Ag  thickness: 2 µm | 0.97 | 0.65 | California, USA | Ø200 | Pt100 | Foam + PE film + enclosure | Maximum ∆*T* of 4.9 °C under solar intensity of 800–870 W/m2 | 22 |
| SiO2/Si3N4/Ag  thickness: 2 µm | 0.98 | 0.75 | Suzhou, China | 70×70 | thermocouple | Foam + PE film + enclosure | Maximum ∆*T* of 8.3 °C under solar intensity of 700 W/m2 | 23 |
| SiO2/Si3N4/Al2O3/Ag  thickness: 2 µm | 0.95 | 0.87 | Seoul, South Korea | 50×50 | K-type thermocouple | Foam + PE film + enclosure | Average ∆*T* of 6.2 °C under average solar intensity of 770 W/m2 | 24 |
| SiCNO/Ag  thickness: 5 µm | 0.97 | 0.86 | Oldenburg, Germany | 25×100 | Pt100 | Foam + PE film + enclosure | ∆*T* of 6 °C under solar intensity of 761 W/m2 | 25 |
| PET/EVA/Al  thickness: 80 µm | 0.85 | 0.87 | Bayreuth, Germany | Ø50 | T-type thermocouple | Foam + PE film | Average 0.4 °C above the ambient air temperature under average solar intensity of 738 W/m2 | 26 |
| PDMS/Al  thickness: 100 µm | / | 0.97 | Wuhan, China | 50×50 | thermocouple | Foam + PE film + solar shield | Average ∆*T* of 8.7 °C during 11:30–15:30 | 27 |
| C18H24O4/Al  thickness: 800 µm | 0.91 | 0.95 | Yichang,  China | 50×50 | K-type thermocouple | Air cavity + PE film + enclosure | Maximum ∆*T* of 18.6 °C during 12:00–13:00 | 28 |
| PDMS/Al  thickness: 200 µm | 0.86 | 0.94 | Bayreuth, Germany | Ø50 | T-type thermocouple | Foam + PE film | Slightly above the ambient air temperature during 14:00–17:00 under average solar intensity of 550–850 W/m2 | 29 |
| PDMS/TiO2/MgF2/SiO2/ Ag  thickness: 600 µm | 0.94 | 0.94 | Nanjing, China | Ø100 | K-type thermocouple | Foam + PE film + enclosure | Average ∆*T* of 12.6 °C during 11:00–13:00 under solar intensity of 880 W/m2 | 30 |
| PVF/SiO2/Ag  thickness: 550 µm | 0.96 | 0.90 | Xiamen, China | Ø50.8 | K-type thermocouple | Air cavity + PE film + enclosure | Average ∆*T* of 4.5 °C during 10:00–14:00 | 31 |
| PMMA/SiO2/Ta2O5/Saphire/Ag  thickness: 371 µm | 0.98 | 0.93 | Tsukuba, Japan | 20×20 | thermocouple | Foam | Average ∆*T* of 2.5 °C during 9:00–13:00 | 32 |
| PDMS/SiO2/Ag  thickness: 534 µm | 0.95 | 0.98 | Hong Kong, China | Ø101.6 | thermocouple | Air cavity + PE film + enclosure + solar shield | Average ∆*T* of 6.2 °C during 12:00–13:00 | 33 |
| PVF/TMCS coated SiO2/ Ag  thickness: 100 µm | 0.94 | 0.90 | Xiamen, China | 50×50 | K-type thermocouple | Air cavity + PE film + enclosure | Average ∆*T* of 3.3 °C during 10:00–14:00 under average solar intensity of 721 W/m2 | 34 |
| FEVE/SiO2/TiO2  thickness: 285 µm | 0.93 | 0.94 | Nanjing, China | 35×35 | K-type thermocouple | Foam + PE film | Average ∆*T* of 10.9 °C under average solar intensity of 870 W/m2 | 35 |
| TPX/SiO2/ESR  thickness: 200 µm | 0.90 | 0.91 | Alice Springs, Australia | 100×100 | Pt100 | Foam + PE film | Maximum ∆*T* of 4.7 °C at peak air temperature | 36 |
| Acrylic/BaSO4  thickness: 150 µm | 0.98 | 0.96 | Indiana, USA | 50×50 | T-type thermocouple | Air cavity + PE film | Average ∆*T* of 4.5 °C under solar intensity up to 993 W/m2 | 37 |
| PDMS/Y2O3 thickness: 500 µm | 0.94 | 0.93 | Linfen, China | 100×100 | thermocouple | Foam + PE film | Average ∆*T* of 7.4 °C under solar intensity up to 1132 W/m2 | 38 |
| PDMS/ZrO2 thickness: 68.8 µm | 0.92 | 0.95 | Yichang, China | 50×50 | K-type thermocouple | Air cavity + PE film | Average ∆*T* of 16.1 °C under solar intensity up to 745 W/m2 | 39 |
| PDMS/DTMS coated (Al2Si2O5(OH)4)thickness: 422 µm | 0.91 | 0.95 | Yichang, China | 50×50 | K-type thermocouple | Air cavity + PE film | Average ∆*T* of 12.8 °C during 11:30–14:30 under average solar intensity of 1070 W/m2 | 40 |
| PVDF/Ca0.5Mg10.5(HPO3)8(OH)3F  thickness: 160 µm | 0.98 | 0.91 | Guangzhou, China | 200×300 | T-type thermocouple | Foam | Maximum ∆*T* of 5.1 °C under solar intensity of 900 W/m2 | 41 |
| PVdF-HFP  thickness: 500 µm | 0.94 | 0.97 | Los Angeles, USA | 70×70 | thermocouple | Foam | Average ∆*T* of 1.7 °C under peak solar intensity of 1100 W/m2 | 42 |
| Ecoflex/BN  thickness: 1 mm | 0.92 | 0.97 | Chengdu, China | 40×40 | thermocouple | Foam + PE film + enclosure | ∆*T* of 9.5 °C under solar intensity 565 W/m2 | 43 |
| PVDF/PUA  thickness: 518 µm | 0.93 | 0.93 | Seoul, Korea | 150×150 | K-type thermocouple | Foam + PE film + enclosure | Maximum ∆*T* of 8.37 °C during 11:00–13:00 | 44 |
| Epoxy/Polyamide + Modified montmorillonite + h-SiO2  thickness: 100 µm | 0.93 | 0.94 | Nanjing, China | Ø50 | K-type thermocouple | Foam + PE film | ∆*T* of 4.1 °C under average solar intensity of 1020 W/m2 | 45 |
| Styrene/Acrylic/PVdF-HFP/h-SiO2  thickness: 976 µm | 0.94 | 0.92 | Hong Kong, China | Ø100 | thermocouple | Foam | Average ∆*T* of 5 °C average solar intensity of 800 W/m2 | 46 |
| PDMS/Al2O3  thickness: 300 µm | 0.96 | 0.97 | Chicago, USA | 50×50 | thermistor | Foam + PE film | ∆*T* of 5.2 °C during 9:37–10:45 | 47 |
| PVdF-HFP  thickness: 313 µm | 0.97 | 0.94 | Urumqi, China | 200×200 | thermocouple | Foam + PE film | Maximum ∆*T* of 14.9 °C under average solar intensity of 1250 W/m2 | 48 |
| PVdF-HFP/Ag  thickness: 300 µm | 0.96 | 0.95 | Shanghai, China | 100×100 | T-type thermocouple | Foam + PE film | Maximum ∆*T* of 7.1 °C | 49 |
| PVdF-HFP/SiO2  thickness: 320 µm | 0.96 | 0.97 | Deqing, China | 60×60 | K-type thermocouple | Foam + PE film | Average ∆*T* of 6.8 °C under average solar intensity of 920 W/m2 | 50 |
| PVdF  thickness: 700 µm | 0.97 | 0.99 | Wuhan, China | 80×80 | K-type thermocouple | Air cavity + PE film | Average ∆*T* of 4.2 °C | 51 |
| PE/SiO2  thickness: 840 µm | 0.96 | 0.90 | Illinois, USA | 100×100 | thermocouple | Foam + PE film | Average ∆*T* of 6.1 °C under solar intensity of 747 W/m2 | 52 |
| PMMA  thickness: 180 µm | 0.94 | 0.95 | Shanghai, China | 100×100 | thermocouple | Foam + PE film | ∆*T* of 10.6 °C under average solar intensity of 829 W/m2 | 53 |
| TPU  thickness: 500 µm | 0.93 | 0.95 | Langfang, China | 120×120 | K-type thermocouple | Foam + PE film | Maximum ∆*T* of 5.8 °C from 10:00–15:00 | 54 |
| PDMS  thickness: 660 µm | 0.72 | 0.95 | Yichang, China | 50×50 | thermocouple | Air cavity + PE film | Maximum ∆*T* of 14.9 °C under solar intensity of 910 W/m2 | 55 |
| CA/TiO2  thickness: 250 µm | 0.97 | 0.95 | Nanjing, China | 100×100 | K-type thermocouple | Foam + PE film | Average ∆*T* of 4.8 °C | 56 |
| CA  thickness: 1 cm | 0.97 | 9.94 | Zhenjian, China | 65×65 | thermocouple | Foam + PE film | Maximum ∆*T* of 10.5 °C under solar intensity of 640 W/m2 | 57 |
| CA/ZNO  thickness: 320 µm | 0.97 | 0.94 | Chongqing, China | 40×40 | K-type thermocouple | Foam + PE film | ∆*T* of 4.8 °C during 12:00–13:00 | 58 |
| BC + BaSO4  thickness: 7 mm | 0.96 | 0.98 | Shanghai, China | 49×49 | K-type thermocouple | Air cavity + PE film + enclosure | Average ∆*T* of 6.6 °C under average solar intensity of 755 W/m2 | 59 |
| MTMS/DMDS  thickness: 4.5 mm | 0.92 | 0.93 | Suzhou, China | 40×40 | thermocouple | Foam + PE film | Average ∆*T* of 7.5 °C during 13:00–15:00 under solar intensity of 400–500 W/m2 | 60 |
| Chitin  thickness: 34.6um | 0.93 | 0.93 | Bayreuth, Germany | Ø45 | Pt100 | Foam + PE film | Max ∆*T* of 3.5 °C during 10:00–18:00 | 61 |
| Delignified wood  thickness: 1 mm | 0.92 | 0.96 | Nanjing, China | 100×100 | thermocouple | Foam + radiation shield | Average ∆*T* of 2.6 °C during 11:00–14:00 | 62 |
| Expanded PTFE  thickness: 500 µm | 0.98 | 0.86 | Hongkong, China | 100×100 | K-type thermocouple | Foam + PE film | Maximum ∆*T* of 2.7 °C under solar intensity of 1000 W/m2 | 63 |
| PU/h-TiO2  thickness: 1 mm | 0.93 | 0.89 | Shanghai, China | 100×100 | K-type thermocouple | Foam + PE film | Maximum ∆*T* of 17.4 °C under peak solar intensity of 980 W/m2 | 64 |
| TPX/CaCO3  thickness: 600 µm | 0.96 | 0.95 | Texas, USA | 100×100 | K-type thermocouple | Foam + vacuum panel + PE film | Average ∆*T* of 4.1 °C during 12:00–14:00 | 65 |
| PES/TiO2/Al2O3  thickness: 400 µm | 0.97 | 0.92 | Hong Kong | 100×100 | T-type thermocouple | Foam | Average ∆*T* of 2 °C under peak solar intensity of 986 W/m2 | 66 |
| CA  thickness: 275 µm | 0.90 | 0.74 | Norrkoping, Sweden | 50×50 | thermocouple | Foam + PE | Average ∆*T* of 4 °C | 67 |
| PVDF/Al2O3  thickness: 500 µm | 0.97 | 0.95 | Qingdao, China | 70×70 | thermocouple | Foam | Average ∆*T* of 4 °C under average solar intensity of 850 W/m2 | 68 |
| CsPbBR3 + PDMS/Ag  thickness: 60 µm | 0.94 | 0.90 | Soeul, Korea | 25×25 | K-type thermocouple | Foam + PE + enclosure | ∆*T* of 7.4 °C during 10:00–16:00 | 69 |
| CA/CsPbX3 | 0.89 | 0.95 | Nanjing, China | 100×100 | K-type thermocouple | Foam + PE | ∆*T* of 5.4 °C under peak solar intensity of 740 W/m2 | 70 |

Note: *R*solar, *ε*LWIR, and ∆*T* stand for solar reflectance, long-wave infrared emissivity, and temperature difference below ambient, respectively.

**Supplementary Table 2** Accuracy of typical surface temperature sensors used in the literature (* made with standard thermocouple wire; ** made with a higher grade of thermocouple wire). For thermocouples, the accuracies are according to IEC 60584-171. For RTD sensors, the accuracies are according to IEC 6075172.

| **Type** | **Calibration** | **Temperature range (°C)** | **Accuracy/standard limits of error*(greater of)** | **Accuracy/special limits of error**(greater of)** |
| --- | --- | --- | --- | --- |
| Thermocouple | J | 0–750 | ±2.2 °C or ±0.75% | ±1.1 °C or ±0.4% |
| K | -200–1250 | ±2.2 °C or ±0.75% | ±1.1 °C or ±0.4% |
| E | -200–900 | ±1.7 °C or ±0.5% | ±1.0 °C or ±0.4% |
| T | -250–350 | ±1.0 °C or ±0.75% | ±0.5 °C or ±0.4% |
| RTD Pt100 | DIN A | -73–260 | ±0.15 °C or ±0.06% at 0 °C | |
| DIN B | -73–260 | ±0.30 °C or ±0.12% at 0 °C | |

**Supplementary Table 3** Systematic and unsystematic biases in centre temperature measurements for PDRC samples with different setups.

**Clear-sky conditions (12:00–13:00)**

| **Reference** | **Sample** | **RMSDs (**°C**)** | **RMSDu (**°C**)** | **MSDs** | **MSDu** | **MSD** | **Proportion of MSDs (%)** |
| --- | --- | --- | --- | --- | --- | --- | --- |
| R-200-S | R-50 | 1.61 | 0.25 | 2.59 | 0.06 | 2.66 | 97.6 |
| R-100 | 1.07 | 0.17 | 1.14 | 0.03 | 1.17 | 97.4 |
| R-150 | 0.27 | 0.15 | 0.07 | 0.02 | 0.09 | 75.7 |
| R-200 | 0.66 | 0.29 | 0.44 | 0.08 | 0.52 | 84.1 |
| R-250 | 0.55 | 0.26 | 0.3 | 0.07 | 0.37 | 82.1 |
| R-300 | 0.35 | 0.19 | 0.12 | 0.04 | 0.16 | 77.3 |
| R-200-X | 0.96 | 0.16 | 0.92 | 0.03 | 0.95 | 97.2 |
| R-200-PE | 3.45 | 0.21 | 11.88 | 0.05 | 11.92 | 99.6 |
| R-100-E | 0.82 | 0.23 | 0.68 | 0.05 | 0.73 | 92.8 |
| R-100-L | 1.67 | 0.38 | 2.78 | 0.15 | 2.93 | 95.0 |
| R-100-M | 2.36 | 0.28 | 5.55 | 0.08 | 5.63 | 98.6 |
| R-100-R | 1.48 | 0.34 | 2.19 | 0.12 | 2.31 | 95.0 |

**Overcast sky conditions (16:00–17:00)**

| **Reference** | **Sample** | **RMSDs (**°C**)** | **RMSDu (**°C**)** | **MSDs** | **MSDu** | **MSD** | **Proportion of MSDs (%)** |
| --- | --- | --- | --- | --- | --- | --- | --- |
| R-200-S | R-50 | 0.50 | 0.25 | 0.25 | 0.06 | 0.31 | 79.2 |
| R-100 | 0.10 | 0.09 | 0.01 | 0.01 | 0.02 | 56.8 |
| R-150 | 0.13 | 0.14 | 0.02 | 0.02 | 0.04 | 45.8 |
| R-200 | 0.52 | 0.09 | 0.27 | 0.01 | 0.27 | 97.1 |
| R-250 | 0.14 | 0.09 | 0.02 | 0.01 | 0.03 | 71.3 |
| R-300 | 0.20 | 0.13 | 0.04 | 0.02 | 0.06 | 72.0 |
| R-200-X | 0.48 | 0.11 | 0.23 | 0.01 | 0.24 | 94.8 |
| R-200-PE | 1.53 | 0.19 | 2.33 | 0.04 | 2.37 | 98.5 |
| R-100-E | 0.98 | 0.13 | 0.95 | 0.02 | 0.97 | 98.3 |
| R-100-L | 0.69 | 0.11 | 0.47 | 0.01 | 0.48 | 97.3 |
| R-100-M | 0.73 | 0.12 | 0.54 | 0.01 | 0.55 | 97.6 |
| R-100-R | 0.63 | 0.12 | 0.39 | 0.01 | 0.41 | 96.7 |

**Supplementary Table 4** Details of the tested PDRC samples.

| **Samples** | **Description** | **Comparison target** | **Testing site** |
| --- | --- | --- | --- |
| R-50, R-100, R-150, R-200, R-250, and R-300 | RC samples of varying sizes | Pairwise | Blacktown |
| R-200-PE-1 and R-200-PE-2 | PE-covered PDRC samples | R-200 | Blacktown |
| R-200-S-1 and R-200-S-2 | RC Samples surrounded by buffering boards | Other setups | Blacktown |
| R-200-X | RC sample masked with silver tape | R-200 | Blacktown |
| R-100-E | RC sample without EPS mask | R-100 | Blacktown |
| R-100-L, R-100-M, and R-100-R | RC samples placed together with non-PDRC samples | R-100 | Blacktown |
| R-100, R-150, R-200, R-250, and R-300 | RC samples of varying sizes | Pairwise | Alice Springs |
| R-200-PE-1 and R-200-PE-2 | PE-covered PDRC samples | R-200 | Alice Springs |
| R-200-S-1 and R-200-S-2 | RC samples surrounded by buffering boards | Other setups | Alice Springs |

**Supplementary Table 5** Instruments used in the field test.

| **Sensor** | **Instrument** | **Range** | **Accuracy** |
| --- | --- | --- | --- |
| Surface temperature | Omega SA1-RTD-120 | -73–260 °C | ±0.15 °C |
| Solar radiation | Hukseflux NR01 | 285–3000 nm | ±2.4% |
| Infrared radiation | Hukseflux NR01 | 4.5–42 µm | ±7% |
| Air temperature | Gill MetPak Pro | -35–70 °C | ±0.1 °C |
| Relative humidity | Gill MetPak Pro | 0–100% | ±0.8% |
| Dew point | Gill MetPak Pro | / | ±0.15 °C |
| Wind speed | Gill MetPak Pro | 0–60 m/s | ±2% |
| Wind direction | Gill MetPak Pro | 0–359° | ±3° |

**Supplementary Fig. 1 Overview of the outdoor test conducted in Alice Springs.** (**a**) Spectral properties of the materials in the 0.3–40 μm waveband. XPS Boards with square samples of varying sizes: (**b**) Board A with 100-mm, 150-mm, and 300-mm samples, (**c**) Board B with 200-mm and 250-mm samples, (**d**) Board C with PE-covered 200-mm samples, with the inset showing the schematic of the cross section of a PE-covered sample, and (**e**) Board D with buffering board-surrounded 200-mm samples. Physical setup: (**f**) Boards A–C and (**g**) Board D. [Note: In (**b**)–(**e**), R, W, and B stand for PDRC, White, and Black samples, respectively. Red spots indicate RTD sensors, with E and Co referring to the edge and centre-offset positions, respectively.]

**Supplementary Fig. 2** Temperature profiles and corresponding meteorological conditions recorded in Alice Springs. Surface–air temperature differences for (**a**) PDRC; (**b**) White; (**c**) Black. Meteorological parameters: (**d**) air temperature (*T*a), dew point (*T*d), and absolute humidity (AH); (**e**) direct solar radiation (SR), and infrared radiation (IR); and (**f**) wind speed (WS) and wind direction (WD). [Data collected from 08:00 to 18:00, 8 April 2024]

**Supplementary Fig. 3** Surface–air temperature differences recorded in Alice Springs. For each sample, two or three RTD sensors were placed at different positions to evaluate surface temperature uniformity: (**a**) R-200, (**b**) R-250, (**c**) R-300, (**d**) W-200, (**e**) W-250, (**f**) W-300, (**g**) B-200, (**h**) B-250, and (**i**) B-300. [Data collected from 12:00 to 13:00, 8 April 2024]

**Supplementary Fig. 4** Centre temperature distributions of samples with varying sizes under overcast sky conditions (16:00–17:00) in Blacktown: (**a**) PDRC, (**b**) White, and (**c**) Black samples in Blacktown.Statistical significance was assessed using the Kruskal–Wallis test with Dunn’s post hoc test; ns, not significant (p > 0.05); *p < 0.05; **p < 0.01; ***p < 0.001.

**Supplementary Fig. 5** Temperature profiles for samples with EPS mask and silver tape mask in Blacktown: (**a**–**c**) PDRC, White, and Black samples**.**

**Supplementary Fig. 6** Temperature differences between two identical samples: (**a**) R-200-PE and R-200-S in Blacktown;(**b**) R-200-PE and R-200-S in Alice Springs.

**
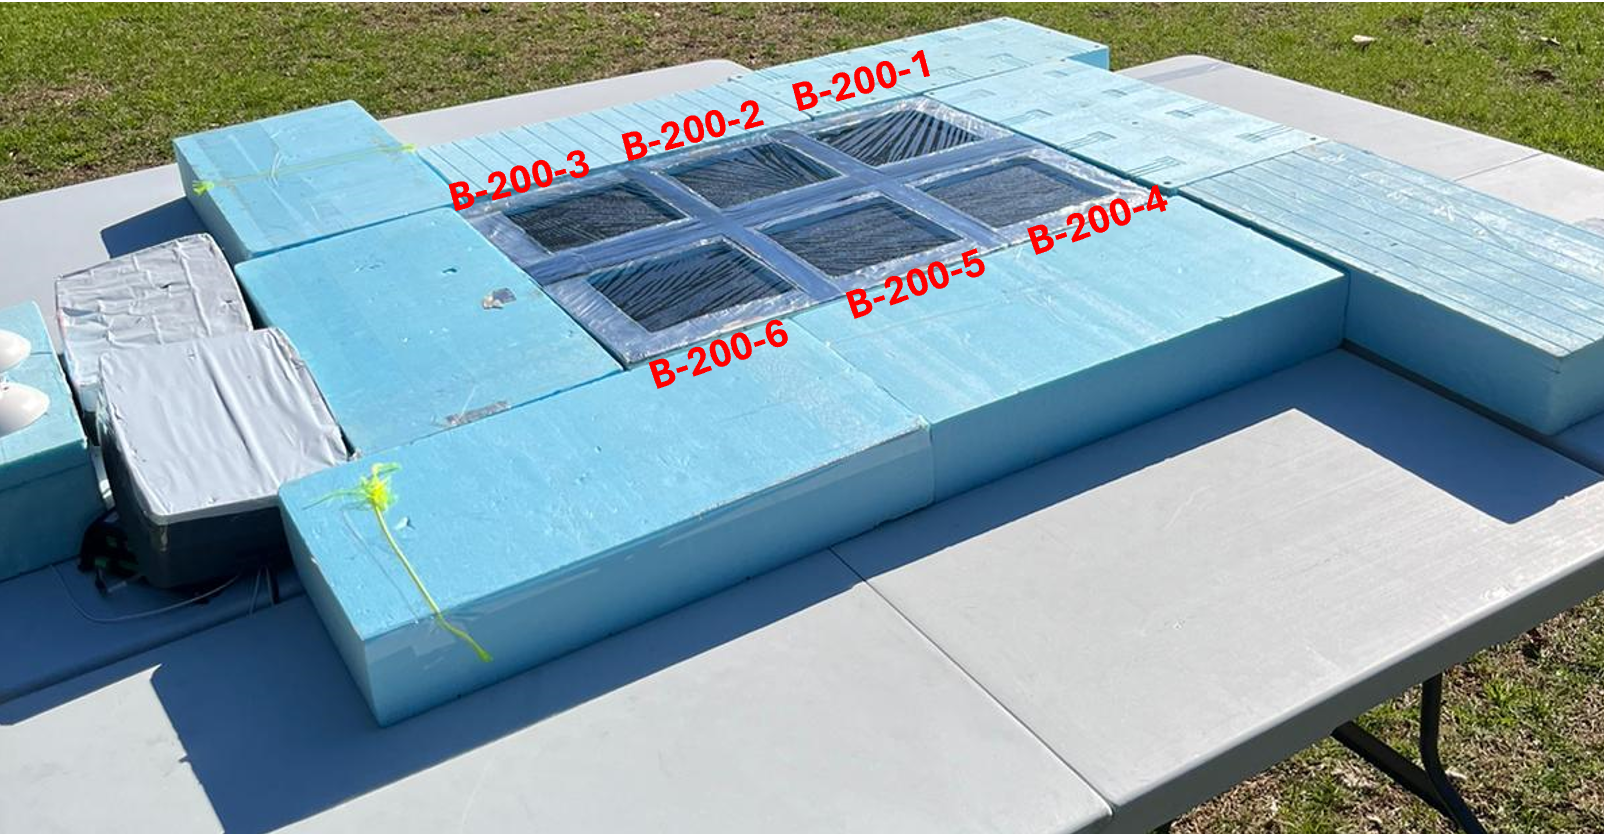
**

**Supplementary Fig. 7** (**a**) Centre temperature variations of six identical 200-mm PE-covered Black samples surrounded by XPS buffering boards. Meteorological parameters: (**b**) ambient air temperature, (**c**) solar and infrared radiation, (**d**) relative and absolute humidity, and (**e**) wind speed and direction. [Data collected from 11:50-14:15, 3 June 2024]

**Supplementary Fig. 8** Relative variable relevance for temperature difference (Δ*T*) between two PDRC experimental setups, with each pairwise comparison designed to isolate the effect of a single variable (over a 24-hour period from 18:00 to 18:00): (**a**) Blacktown and (**b**) Alice Springs. [Note: Sample size was analysed using the Δ*T* between R-50 and R-300; PE film cover was analysed using the Δ*T* between R-200 and R-200-PE; Mask material was analysed using the Δ*T* between R-200 and R-200-X; EPS mask was analysed using the Δ*T* between R-100 and R-100-E; Thermal interference was analysed using the Δ*T* between R-100 and R-100-M; Buffering board was analysed using the Δ*T* between R-200 and R-200-S. SR = solar radiation, IR = infrared radiation; Ta = ambient air temperature; AH = absolute humidity; WS = wind speed.]

**Supplementary Fig. 9** (**a**) Size effects for the PDRC and White emitter in Blacktown under clear-sky conditions (12:00–13:00). (**b**) Size effect-induced underestimation of the cooling performance difference between the PDRC and White emitter.

**Supplementary Note 1 Additional test for confirming the size effect on PDRC samples**

The size effect observed in Blacktown was not strictly monotonic, as R-150 was unexpectedly cooler than both R-200 and R-250. To verify this, we conducted an additional test on 7 April 2025 under clear sky and weak wind. To assess whether sample positioning influenced the results, the test was divided into two parts: (i) placing the PDRC samples together as in the Blacktown test (from 10:45 to 12:20), and (ii) distributing them at 600 mm intervals (from 12:30 to 14:00) (Supplementary [Fig. 10](#FigureS10)a, b). This test confirmed a more monotonic micro cool island effect for the same PDRC samples, regardless of whether they were placed close together or distributed apart (Supplementary [Fig. 10](#FigureS10)c). Notably, the centre temperature difference between R-50 and R-300 was about 2 °C, exceeding those observed in Blacktown and Alice Springs.

**Supplementary Fig. 10** Temperature profiles and corresponding meteorological conditions recorded at UNSW. Testing configurations: (**a**) PDRC samples placed close together and (b) PDRC samples distributed apart at 600 mm. (**c**) Surface–air temperature differences for PDRC samples of varying sizes. Meteorological parameters: (**d**) air temperature (*T*a), dew point (*T*d), and absolute humidity (AH); (**e**) direct solar radiation (SR), and infrared radiation (IR); and (**f**) wind speed (WS) and wind direction (WD). [Data collected from 10:45 to 14:00, 7 April 2025]

**Supplementary Note 2 Measurement uncertainty**

To evaluate the measurement uncertainty of the R-200-S setup, we simultaneously monitored ten identical 200-mm PDRC samples from the same batch on 9 August 2024, from 12:30 to 14:30 under clear sky and weak wind (Supplementary [Fig. 11](#FigureS11)c, e). The samples were surrounded by XPS buffering boards that formed a 400-mm cornice. This test quantified the combined uncertainty of the setup, arising from sensor accuracy, adhesion to the sample, and datalogger noise. The average standard deviation across the samples during the 2-h outdoor test was ±0.3 °C (Supplementary [Fig. 11](#FigureS11)b), which was adopted as the measurement uncertainty of the setup.

**Supplementary Fig. 11** Outdoor test at UNSW for measurement uncertainty in the whole experimental setup: (**a**) air temperature and average surface temperature of ten identical PDRC samples, (**b**) standard deviation of the samples, (**c**) shortwave and infrared radiation, (**d**) relative and absolute humidity, (**e**) wind speed and direction, and (**f**) physical setup. [Data collected from 12:30 to 14:30, 9 August 2024]

**Supplementary Note 3 Thermal interference induced by mixed placement of PDRC and non-PDRC samples**

In the Blacktown test, we examined the potential thermal interference between PDRC and non-PDRC samples placed together. Nine 100-mm samples (three each of PDRC, White, and Black emitters) were placed together on a 400 mm × 400 mm × 100 mm EPS board (Supplementary [Fig. 12](#FigureS12)a). Between 12:00 and 13:00, R-100-M was 1.3 °C warmer than R-100, while B-100-M was 4.5 °C cooler than B-100 (Supplementary [Fig. 12](#FigureS12)b), indicating mutual thermal interference. Given the mixed placement of PDRC and non-PDRC samples in Alice Springs (Supplementary [Fig. 1](#FigureS1)b, c), such interference likely contributed to the less consistent size effects observed there.

**Supplementary Fig. 12** Thermal interference caused by mixing PDRC and non-PDRC samples on the same holding board in Blacktown: (**a**) sample placement and labels; (**b**) hourly averaged temperature differences between each sample and its counterpart (R-100, W-100, and B-100).

**Supplementary Note 4 Additional tests for explaining the observed size effects**

To explain the observed size effects, we conducted an additional test on 11 September 2024, comparing the centre temperature differences between 95 mm × 95 mm and 190 mm × 205 mm metal plates with progressively increased *R*sol (Supplementary [Fig. 13](#FigureS13)a, b). During 10:30 to 14:00, the centre temperature difference between two plates increased with their *R*sol (Supplementary [Fig. 13](#FigureS13)c), indicating that the size effect is mainly driven by the mismatch in *R*sol between the mask and the emitters. This test also shows that the size effect persists even with high-conductivity metal substrates.

**Supplementary Fig. 13** (**a**)Experimental setupfor testing metal plate samples of different colours, with red spots indicating RTD sensor locations; (**b**) ratio of the solar reflectance between the sample and the mask (aluminium tape); (**c**) temperature differences between the small and large samples. [Data collected from 10:15 to 14:00, 11 September 2024]

In another test, we compared four PDRC samples on 400-mm EPS boards: R-50, R-200, R-200-1, and R-200-2 (Supplementary [Fig. 14](#FigureS14)a). R-200-1 was prepared by patching a 200-mm PDRC film with a 55-mm patch, while R-200-2 was prepared by cutting a 2.5-mm seam into a 200-mm PDRC film. The test was conducted on 12 December 2024, from 12:10 to 12:40, under strong solar irradiance and weak wind (Supplementary [Fig. 14](#FigureS14)c, e). R-200-1 and R-200 showed only minor differences, whereas R-200-2 warmer centre temperatures comparable to R-50 (Supplementary [Fig. 14](#FigureS14)b). On average, R-200-2 was 1.1 °C warmer than R-200 due to the 2.5-mm seam, which reduced the effective *R*sol of the surrounding mask (Supplementary [Fig. 14](#FigureS14)f).

**Supplementary Fig. 14** Temperature profiles and corresponding meteorological conditions recorded at UNSW. (**a**) Samples: R-50, R-200, R-200-1, and R-200-2. R-200-1 was prepared by patching a hollow 200 × 200 mm PDRC film with a 55 × 55 mm PDRC patch, while R-200-2 was prepared by cutting a 2.5-mm seam into a 200 × 200 mm PDRC film. (**b**) Surface–air temperature differences for the PDRC samples. Meteorological parameters: (**c**) direct solar radiation (SR) and infrared radiation (IR); (**d**) air temperature (*T*a), dew point (*T*d), and absolute humidity (AH); (**e**) wind speed (WS) and wind direction (WD). (**f**) Average temperatures of the samples. [Data collected from 12:10 to 12:40, 12 December 2024]

**Supplementary Note 5 Discussion on the opposing size effects produced by the White emitter**

The White emitter exhibited opposing size effects: a micro heat island effect in Blacktown ([Fig. 4](#Figure4)b) and a micro cool island effect in Alice Springs ([Fig. 4](#Figure4)e). The numerical modelling indicates that these size effects were mainly driven by the mismatch in solar reflectance (*R*sol) between the emitters and the mask. In Blacktown, the White emitter had lower *R*sol but higher infrared emissivity (*ε*IR) than the EPS mask (Supplementary [Fig. 15](#FigureS15)a). Under the relatively humid atmosphere, *R*sol dominated over *ε*IR in determining surface temperature, making the EPS mask cooler than the White emitter. In Alice Springs, the White emitter had lower *R*sol but significantly higher *ε*IR than the Aluminium tape mask (Supplementary [Fig. 15](#FigureS15)b). Under the relatively dry atmosphere, *ε*IR dominated over *R*sol, making the aluminium tape mask hotter than the White emitter.

**Supplementary Fig. 15** Spectral properties of the White emitter and mask material in (**a**) Blacktown and (**b**) Alice Springs.

**Supplementary Note 6 Testing information in Alice Springs**

In Alice Springs, the PDRC, White, and Black samples were placed on 100-mm-thick expanded extruded polystyrene (XPS) boards to minimise parasitic heat conduction. Reflective aluminium foil was applied to the XPS boards to reduce the impact of solar radiation. Supplementary [Fig. 1](#FigureS1)b–e show the four XPS boards with square samples, labelled as Boards A–D, respectively. To evaluate the effect of varying sample sizes under air-exposed conditions, the samples were sorted into dimensions of 100-mm, 150-mm, 200-mm, 250-mm, and 300-mm (Supplementary [Fig. 1](#FigureS1)b, c). For the 200-mm and 250-mm samples, three RTD sensors were attached: one at the centre, one at the centre-offset, and one at the edge. For the 300-mm samples, two RTD sensors were attached: one at the centre and one at the edge. For the remaining samples, one RTD sensor was attached at the centre. Supplementary [Fig. 1](#FigureS1)d, e show the PE-covered and buffering board-surrounded 200-mm samples, respectively. The PE covers were installed 10 mm above the samples. During the field test, Boards A-C were spaced 1 m apart (Supplementary [Fig. 1](#FigureS1)f), while Board D was placed in a different area and surrounded by XPS buffering boards (Supplementary [Fig. 1](#FigureS1)g). The XPS boards formed a 500-mm cornice around the 200-mm samples to stabilise their surface boundary layer.

Absolute humidity (AH) was calculated from *T*a and RH as follows:

(1)

**Supplementary Note 7 Statistical significance tests**

Sig equals 1 indicates that the difference of the means is significant at the 0.05 level. Sig equals 0 indicates that the difference of the means is NOT significant at the 0.05 level.

**Dunn’s post hoc test for R-50 to R-300 in Blacktown (12:00–13:00)**

|  | **Mean Rank Diff** | **Z (Test Statistic)** | **Prob (p-value)** | **Sig** |
| --- | --- | --- | --- | --- |
| "R-50" "R-100" | 195.11618 | 5.12931 | 4.36205E-6 | 1 |
| "R-50" "R-150" | 726.55187 | 19.09996 | 3.79033E-80 | 1 |
| "R-50" "R-200" | 432.49793 | 11.36972 | 8.87642E-29 | 1 |
| "R-50" "R-250" | 496.74274 | 13.05862 | 8.51194E-38 | 1 |
| "R-50" "R-300" | 664.3112 | 17.46374 | 4.05882E-67 | 1 |
| "R-100" "R-150" | 531.43568 | 13.97065 | 3.53218E-43 | 1 |
| "R-100" "R-200" | 237.38174 | 6.24041 | 6.54639E-9 | 1 |
| "R-100" "R-250" | 301.62656 | 7.92931 | 3.30551E-14 | 1 |
| "R-100" "R-300" | 469.19502 | 12.33443 | 8.86552E-34 | 1 |
| "R-150" "R-200" | -294.05394 | -7.73024 | 1.6102E-13 | 1 |
| "R-150" "R-250" | -229.80913 | -6.04134 | 2.29263E-8 | 1 |
| "R-150" "R-300" | -62.24066 | -1.63621 | 1 | 0 |
| "R-200" "R-250" | 64.24481 | 1.6889 | 1 | 0 |
| "R-200" "R-300" | 231.81328 | 6.09402 | 1.65162E-8 | 1 |
| "R-250" "R-300" | 167.56846 | 4.40512 | 1.58585E-4 | 1 |

**Dunn’s post hoc test for W-50 to W-300 in Blacktown (12:00–13:00)**

|  | **Mean Rank Diff** | **Z (Test Statistic)** | **Prob (p-value)** | **Sig** |
| --- | --- | --- | --- | --- |
| "W-50" "W-100" | -181.09336 | -4.76067 | 2.89424E-5 | 1 |
| "W-50" "W-150" | -152.76556 | -4.01598 | 8.88E-4 | 1 |
| "W-50" "W-200" | -394.46058 | -10.36978 | 5.10483E-24 | 1 |
| "W-50" "W-250" | -603.23029 | -15.85802 | 1.85607E-55 | 1 |
| "W-50" "W-300" | -539.97718 | -14.19519 | 1.47183E-44 | 1 |
| "W-100" "W-150" | 28.3278 | 0.7447 | 1 | 0 |
| "W-100" "W-200" | -213.36722 | -5.6091 | 3.05066E-7 | 1 |
| "W-100" "W-250" | -422.13693 | -11.09735 | 1.93838E-27 | 1 |
| "W-100" "W-300" | -358.88382 | -9.43452 | 5.89204E-20 | 1 |
| "W-150" "W-200" | -241.69502 | -6.3538 | 3.15092E-9 | 1 |
| "W-150" "W-250" | -450.46473 | -11.84204 | 3.54936E-31 | 1 |
| "W-150" "W-300" | -387.21162 | -10.17921 | 3.68314E-23 | 1 |
| "W-200" "W-250" | -208.76971 | -5.48824 | 6.08931E-7 | 1 |
| "W-200" "W-300" | -145.5166 | -3.82541 | 0.00196 | 1 |
| "W-250" "W-300" | 63.25311 | 1.66283 | 1 | 0 |

**Dunn’s post hoc test for B-50 to B-300 in Blacktown (12:00–13:00)**

|  | **Mean Rank Diff** | **Z (Test Statistic)** | **Prob (p-value)** | **Sig** |
| --- | --- | --- | --- | --- |
| "B-50" "B-100" | -328.71992 | -8.64155 | 8.31807E-17 | 1 |
| "B-50" "B-150" | -559.99378 | -14.7214 | 7.04788E-48 | 1 |
| "B-50" "B-200" | -783.60788 | -20.59988 | 4.12724E-93 | 1 |
| "B-50" "B-250" | -864.57261 | -22.72832 | 3.5277E-113 | 1 |
| "B-50" "B-300" | -923.64938 | -24.28136 | 4.62839E-129 | 1 |
| "B-100" "B-150" | -231.27386 | -6.07984 | 1.80451E-8 | 1 |
| "B-100" "B-200" | -454.88797 | -11.95832 | 8.81052E-32 | 1 |
| "B-100" "B-250" | -535.8527 | -14.08676 | 6.8712E-44 | 1 |
| "B-100" "B-300" | -594.92946 | -15.6398 | 5.849E-54 | 1 |
| "B-150" "B-200" | -223.61411 | -5.87848 | 6.21079E-8 | 1 |
| "B-150" "B-250" | -304.57884 | -8.00692 | 1.76425E-14 | 1 |
| "B-150" "B-300" | -363.6556 | -9.55996 | 1.76703E-20 | 1 |
| "B-200" "B-250" | -80.96473 | -2.12844 | 0.49951 | 0 |
| "B-200" "B-300" | -140.04149 | -3.68148 | 0.00348 | 1 |
| "B-250" "B-300" | -59.07676 | -1.55304 | 1 | 0 |

**Dunn’s post hoc test for R-100 to R-300 in Alice Springs (12:00–13:00)**

|  | **Mean Rank Diff** | **Z (Test Statistic)** | **Prob (p-value)** | **Sig** |
| --- | --- | --- | --- | --- |
| "R-100" "R-150" | 218.58091 | 6.89492 | 5.38947E-11 | 1 |
| "R-100" "R-300" | 613.15353 | 19.34133 | 2.41182E-82 | 1 |
| "R-100" "R-250" | 828.8527 | 26.14535 | 1.1132E-149 | 1 |
| "R-100" "R-200" | 639.3195 | 20.16671 | 1.92E-89 | 1 |
| "R-150" "R-300" | 394.57261 | 12.44641 | 1.46283E-34 | 1 |
| "R-150" "R-250" | 610.27178 | 19.25043 | 1.40005E-81 | 1 |
| "R-150" "R-200" | 420.73859 | 13.27179 | 3.37435E-39 | 1 |
| "R-300" "R-250" | 215.69917 | 6.80402 | 1.0174E-10 | 1 |
| "R-300" "R-200" | 26.16598 | 0.82538 | 1 | 0 |
| "R-250" "R-200" | -189.5332 | -5.97864 | 2.25009E-8 | 1 |

**Dunn’s post hoc test for W-100 to W-300 in Alice Springs (12:00–13:00)**

|  | **Mean Rank Diff** | **Z (Test Statistic)** | **Prob (p-value)** | **Sig** |
| --- | --- | --- | --- | --- |
| "W-100" "W-150" | 10.83817 | 0.34188 | 1 | 0 |
| "W-100" "W-300" | 727.37759 | 22.94441 | 1.67536E-115 | 1 |
| "W-100" "W-250" | 483.88382 | 15.26364 | 1.3358E-51 | 1 |
| "W-100" "W-200" | 612.23651 | 19.3124 | 4.22458E-82 | 1 |
| "W-150" "W-300" | 716.53942 | 22.60254 | 4.09191E-112 | 1 |
| "W-150" "W-250" | 473.04564 | 14.92176 | 2.37906E-49 | 1 |
| "W-150" "W-200" | 601.39834 | 18.97052 | 2.9892E-79 | 1 |
| "W-300" "W-250" | -243.49378 | -7.68077 | 1.58131E-13 | 1 |
| "W-300" "W-200" | -115.14108 | -3.63201 | 0.00281 | 1 |
| "W-250" "W-200" | 128.3527 | 4.04876 | 5.14896E-4 | 1 |

**Dunn’s post hoc test for B-100 to B-300 in Alice Springs (12:00–13:00)**

|  | **Mean Rank Diff** | **Z (Test Statistic)** | **Prob (p-value)** | **Sig** |
| --- | --- | --- | --- | --- |
| "B-100" "B-150" | -427.24896 | -13.47715 | 2.13189E-40 | 1 |
| "B-100" "B-300" | -786.92946 | -24.82292 | 5.07248E-135 | 1 |
| "B-100" "B-250" | -713.49793 | -22.50659 | 3.57752E-111 | 1 |
| "B-100" "B-200" | -119.81328 | -3.77939 | 0.00157 | 1 |
| "B-150" "B-300" | -359.6805 | -11.34577 | 7.78403E-29 | 1 |
| "B-150" "B-250" | -286.24896 | -9.02944 | 1.7255E-18 | 1 |
| "B-150" "B-200" | 307.43568 | 9.69776 | 3.08202E-21 | 1 |
| "B-300" "B-250" | 73.43154 | 2.31633 | 0.20541 | 0 |
| "B-300" "B-200" | 667.11618 | 21.04352 | 2.62155E-97 | 1 |
| "B-250" "B-200" | 593.68465 | 18.7272 | 2.97149E-77 | 1 |

**Dunn’s post hoc test for R-50 to R-300 in Blacktown (16:00–17:00)**

|  | **Mean Rank Diff** | **Z (Test Statistic)** | **Prob (p-value)** | **Sig** |
| --- | --- | --- | --- | --- |
| "R-50" "R-100" | 109.19295 | 2.87052 | 0.06147 | 0 |
| "R-50" "R-150" | 92.77593 | 2.43894 | 0.22096 | 0 |
| "R-50" "R-200" | -9.13485 | -0.24014 | 1 | 0 |
| "R-50" "R-250" | 101.84855 | 2.67745 | 0.11128 | 0 |
| "R-50" "R-300" | 69.66183 | 1.8313 | 1 | 0 |
| "R-100" "R-150" | -16.41701 | -0.43158 | 1 | 0 |
| "R-100" "R-200" | -118.3278 | -3.11066 | 0.028 | 1 |
| "R-100" "R-250" | -7.3444 | -0.19307 | 1 | 0 |
| "R-100" "R-300" | -39.53112 | -1.03921 | 1 | 0 |
| "R-150" "R-200" | -101.91079 | -2.67908 | 0.11074 | 0 |
| "R-150" "R-250" | 9.07261 | 0.23851 | 1 | 0 |
| "R-150" "R-300" | -23.11411 | -0.60764 | 1 | 0 |
| "R-200" "R-250" | 110.9834 | 2.91759 | 0.05291 | 0 |
| "R-200" "R-300" | 78.79668 | 2.07145 | 0.57476 | 0 |
| "R-250" "R-300" | -32.18672 | -0.84614 | 1 | 0 |

**Dunn’s post hoc test for W-50 to W-300 in Blacktown (16:00–17:00)**

|  | **Mean Rank Diff** | **Z (Test Statistic)** | **Prob (p-value)** | **Sig** |
| --- | --- | --- | --- | --- |
| "W-50" "W-100" | -22.24274 | -0.58473 | 1 | 0 |
| "W-50" "W-150" | -52.96058 | -1.39225 | 1 | 0 |
| "W-50" "W-200" | -72.66183 | -1.91017 | 0.84167 | 0 |
| "W-50" "W-250" | -45.06639 | -1.18473 | 1 | 0 |
| "W-50" "W-300" | -52.42116 | -1.37807 | 1 | 0 |
| "W-100" "W-150" | -30.71784 | -0.80753 | 1 | 0 |
| "W-100" "W-200" | -50.41909 | -1.32544 | 1 | 0 |
| "W-100" "W-250" | -22.82365 | -0.6 | 1 | 0 |
| "W-100" "W-300" | -30.17842 | -0.79335 | 1 | 0 |
| "W-150" "W-200" | -19.70124 | -0.51792 | 1 | 0 |
| "W-150" "W-250" | 7.89419 | 0.20753 | 1 | 0 |
| "W-150" "W-300" | 0.53942 | 0.01418 | 1 | 0 |
| "W-200" "W-250" | 27.59544 | 0.72544 | 1 | 0 |
| "W-200" "W-300" | 20.24066 | 0.5321 | 1 | 0 |
| "W-250" "W-300" | -7.35477 | -0.19335 | 1 | 0 |

**Dunn’s post hoc test for B-50 to B-300 in Blacktown (16:00–17:00)**

|  | **Mean Rank Diff** | **Z (Test Statistic)** | **Prob (p-value)** | **Sig** |
| --- | --- | --- | --- | --- |
| "B-50" "B-100" | -118.90871 | -3.12593 | 0.02659 | 1 |
| "B-50" "B-150" | -140.22199 | -3.68623 | 0.00341 | 1 |
| "B-50" "B-200" | -302.13278 | -7.94262 | 2.96941E-14 | 1 |
| "B-50" "B-250" | -303.39419 | -7.97578 | 2.27138E-14 | 1 |
| "B-50" "B-300" | -228.1639 | -5.99809 | 2.99486E-8 | 1 |
| "B-100" "B-150" | -21.31328 | -0.56029 | 1 | 0 |
| "B-100" "B-200" | -183.22407 | -4.81669 | 2.18944E-5 | 1 |
| "B-100" "B-250" | -184.48548 | -4.84985 | 1.85336E-5 | 1 |
| "B-100" "B-300" | -109.25519 | -2.87215 | 0.06115 | 0 |
| "B-150" "B-200" | -161.91079 | -4.25639 | 3.1163E-4 | 1 |
| "B-150" "B-250" | -163.1722 | -4.28955 | 2.68551E-4 | 1 |
| "B-150" "B-300" | -87.94191 | -2.31186 | 0.31178 | 0 |
| "B-200" "B-250" | -1.26141 | -0.03316 | 1 | 0 |
| "B-200" "B-300" | 73.96888 | 1.94453 | 0.77747 | 0 |

**Supplementary Note 8 Numerical simulation**


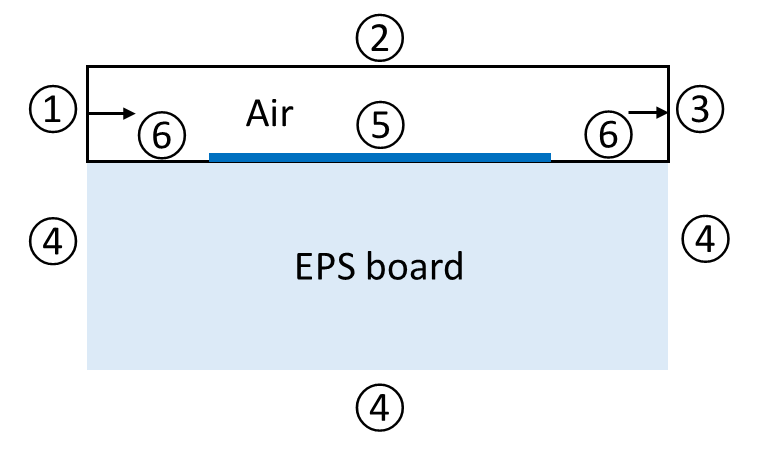


**Supplementary Fig. 16** Physical model of PPDRC prototype

**Boundary conditions:**

| Boundary number | Thermal Boundary Condition | Fluid Boundary Condition |
| --- | --- | --- |
| ① Air inlet | Ambient temperature | Wind speed |
| ② Air boundary | Symmetry | Symmetry |
| ③ Air outlet | Thermal insulation | Static pressure |
| ④ EPS side | Thermal insulation | / |
| ⑤ Sample | *P*sol; *P*amb; *P*rad; *P*conv | No-slip wall |
| ⑥ Mask | *P*sol; *P*amb; *P*rad; *P*conv | No-slip wall |

**Governing equations**

Energy conservation equation for heat conduction in solid is:

(1)

where *ρ* denotes the density of the material; *cp* denotes the heat capacity; *t* is the time; *k* denotes the thermal conductivity of the material.

Continuity equation for air flow:

(2)

Momentum equation for air flow:

(3)

where *ρair* denotes the density of air; *U* denotes the velocity of air; *t* is the time; *P* is the pressure; *μ* denotes the viscosity of air.

Energy equation for air flow:

(4)

where *cp,air* denotes the heat capacity of air; *T* denotes the temperature of air; *t* is the time; *kair* is the thermal conductivity of air.

**Numerical procedure**

The finite element method is employed to solve the governing equations. COMSOL Multiphysics, with its built-in finite element analysis capabilities, is used to model the coupled fluid flow and heat transfer. The following assumptions are made to simplify the model: (i) air is treated as an incompressible and laminar fluid; (ii) the board is thermally insulated on all sides except the top surface; and (iii) the thickness of the samples and the mask is neglected. The total number of mesh elements is 4,960. Boundary layer refinement is applied within the fluid domain at the fluid–structure interaction (FSI) interface.

# Supplementary references

1. Zhao B, Hu M, Ao X, Pei G. Performance evaluation of daytime radiative cooling under different clear sky conditions. *Applied Thermal Engineering* **155**, 660-666 (2019). <https://doi.org/10.1016/j.applthermaleng.2019.04.028>

2. Lin K*, et al.* A flexible and scalable solution for daytime passive radiative cooling using polymer sheets. *Energy and Buildings* **252**, 111400 (2021). <https://doi.org/10.1016/j.enbuild.2021.111400>

3. Zhou L*, et al.* A polydimethylsiloxane-coated metal structure for all-day radiative cooling. *Nature Sustainability* **2**, 718-724 (2019). 10.1038/s41893-019-0348-5

4. Yang Y*, et al.* Bulk material based selective infrared emitter for sub-ambient daytime radiative cooling. *Solar Energy Materials and Solar Cells* **211**, 110548 (2020). <https://doi.org/10.1016/j.solmat.2020.110548>

5. Chen Z, Zhu L, Raman A, Fan S. Radiative cooling to deep sub-freezing temperatures through a 24-h day–night cycle. *Nature Communications* **7**, 13729 (2016). 10.1038/ncomms13729

6. Hwang J. Daytime Radiative Cooling under Extreme Weather Conditions. *Advanced Energy and Sustainability Research* **5**, 2300239 (2024). <https://doi.org/10.1002/aesr.202300239>

7. Lin K-T*, et al.* Highly efficient flexible structured metasurface by roll-to-roll printing for diurnal radiative cooling. *eLight* **3**, 22 (2023). 10.1186/s43593-023-00053-3

8. Carlosena L*, et al.* Experimental development and testing of low-cost scalable radiative cooling materials for building applications. *Solar Energy Materials and Solar Cells* **230**, 111209 (2021). <https://doi.org/10.1016/j.solmat.2021.111209>

9. Cheng Z*, et al.* Efficient radiative cooling coating with biomimetic human skin wrinkle structure. *Nano Energy* **89**, 106377 (2021). <https://doi.org/10.1016/j.nanoen.2021.106377>

10. Huang J, Li M, Fan D. Core-shell particles for devising high-performance full-day radiative cooling paint. *Applied Materials Today* **25**, 101209 (2021). <https://doi.org/10.1016/j.apmt.2021.101209>

11. Han D*, et al.* Sub-ambient radiative cooling under tropical climate using highly reflective polymeric coating. *Solar Energy Materials and Solar Cells* **240**, 111723 (2022). <https://doi.org/10.1016/j.solmat.2022.111723>

12. Wu X*, et al.* A dual-selective thermal emitter with enhanced subambient radiative cooling performance. *Nature Communications* **15**, 815 (2024). 10.1038/s41467-024-45095-4

13. Xiang B*, et al.* 3D porous polymer film with designed pore architecture and auto-deposited SiO2 for highly efficient passive radiative cooling. *Nano Energy* **81**, 105600 (2021). <https://doi.org/10.1016/j.nanoen.2020.105600>

14. Chae D, Son S, Lim H, Jung PH, Ha J, Lee H. Scalable and paint-format microparticle–polymer composite enabling high-performance daytime radiative cooling. *Materials Today Physics* **18**, 100389 (2021). <https://doi.org/10.1016/j.mtphys.2021.100389>

15. Mandal J*, et al.* Hierarchically porous polymer coatings for highly efficient passive daytime radiative cooling. *Science* **362**, 315-319 (2018). doi:10.1126/science.aat9513

16. Liu J*, et al.* Field investigation and performance evaluation of sub-ambient radiative cooling in low latitude seaside. *Renewable Energy* **155**, 90-99 (2020). <https://doi.org/10.1016/j.renene.2020.03.136>

17. Weng Y, Zhang W, Jiang Y, Zhao W, Deng Y. Effective daytime radiative cooling via a template method based PDMS sponge emitter with synergistic thermo-optical activity. *Solar Energy Materials and Solar Cells* **230**, 111205 (2021). <https://doi.org/10.1016/j.solmat.2021.111205>

18. Fan T-T*, et al.* Eco-friendly preparation of durable superhydrophobic porous film for daytime radiative cooling. *Journal of Materials Science* **57**, 10425-10443 (2022). 10.1007/s10853-022-07292-8

19. Leroy A*, et al.* High-performance subambient radiative cooling enabled by optically selective and thermally insulating polyethylene aerogel. *Science Advances* **5**, eaat9480 (2019). doi:10.1126/sciadv.aat9480

20. Wang T, Wu Y, Shi L, Hu X, Chen M, Wu L. A structural polymer for highly efficient all-day passive radiative cooling. *Nature Communications* **12**, 365 (2021). 10.1038/s41467-020-20646-7

21. Yang M*, et al.* Bioinspired “Skin” with Cooperative Thermo-Optical Effect for Daytime Radiative Cooling. *ACS Applied Materials & Interfaces* **12**, 25286-25293 (2020). 10.1021/acsami.0c03897

22. Raman AP, Anoma MA, Zhu L, Rephaeli E, Fan S. Passive radiative cooling below ambient air temperature under direct sunlight. *Nature* **515**, 540-544 (2014). 10.1038/nature13883

23. Ma H*, et al.* Multilayered SiO2/Si3N4 photonic emitter to achieve high-performance all-day radiative cooling. *Solar Energy Materials and Solar Cells* **212**, 110584 (2020). <https://doi.org/10.1016/j.solmat.2020.110584>

24. Chae D*, et al.* Spectrally Selective Inorganic-Based Multilayer Emitter for Daytime Radiative Cooling. *ACS Applied Materials & Interfaces* **12**, 8073-8081 (2020). 10.1021/acsami.9b16742

25. Banik U*, et al.* Efficient Thin Polymer Coating as a Selective Thermal Emitter for Passive Daytime Radiative Cooling. *ACS Applied Materials & Interfaces* **13**, 24130-24137 (2021). 10.1021/acsami.1c04056

26. Song Q, Retsch M. Passive Daytime Cooling Foils for Everyone: A Scalable Lamination Process Based on Upcycling Aluminum-Coated Chips Bags. *ACS Sustainable Chemistry & Engineering* **11**, 10631-10639 (2023). 10.1021/acssuschemeng.3c00683

27. Ming T*, et al.* A generalized solar and thermal management strategy for daytime radiative cooling. *Applied Thermal Engineering* **233**, 121095 (2023). <https://doi.org/10.1016/j.applthermaleng.2023.121095>

28. Tu Y*, et al.* Transparent, anti-corrosion and high broadband emission coating for zero energy consumption cooling technology. *Materials Today Physics* **34**, 101070 (2023). <https://doi.org/10.1016/j.mtphys.2023.101070>

29. Song Q, Tran T, Herrmann K, Schmalz H, Retsch M. Upcycling Chips-Bags for Passive Daytime Cooling. *Advanced Materials Technologies* **8**, 2300444 (2023). <https://doi.org/10.1002/admt.202300444>

30. Zhu Y, Wang D, Fang C, He P, Ye Y-H. A Multilayer Emitter Close to Ideal Solar Reflectance for Efficient Daytime Radiative Cooling. *Polymers* **11**, 1203 (2019).

31. Liu Y*, et al.* Quadruple-layer film for daytime radiative cooling in high humidity environments. *Optical Materials* **136**, 113473 (2023). <https://doi.org/10.1016/j.optmat.2023.113473>

32. Ishii S, Hernández-Pinilla D, Tanjaya NK, Nagao T. Highly reflective multilayer solar reflectors for daytime radiative cooling. *Solar Energy Materials and Solar Cells* **259**, 112463 (2023). <https://doi.org/10.1016/j.solmat.2023.112463>

33. Jeong SY, Tso CY, Wong YM, Chao CYH, Huang B. Daytime passive radiative cooling by ultra emissive bio-inspired polymeric surface. *Solar Energy Materials and Solar Cells* **206**, 110296 (2020). <https://doi.org/10.1016/j.solmat.2019.110296>

34. Liu J, Ma W, Deng X, Cai H. Superhydrophobic nanoparticle mixture coating for highly efficient all-day radiative cooling. *Applied Thermal Engineering* **228**, 120490 (2023). <https://doi.org/10.1016/j.applthermaleng.2023.120490>

35. Liu Y*, et al.* Design and scalable fabrication of core-shell nanospheres embedded spectrally selective single-layer coatings for durable daytime radiative cooling. *Solar Energy Materials and Solar Cells* **260**, 112493 (2023). <https://doi.org/10.1016/j.solmat.2023.112493>

36. Feng J*, et al.* Optimization of random silica-polymethylpentene (TPX) radiative coolers towards substantial cooling capacity. *Solar Energy Materials and Solar Cells* **234**, 111419 (2022). <https://doi.org/10.1016/j.solmat.2021.111419>

37. Li X, Peoples J, Yao P, Ruan X. Ultrawhite BaSO4 Paints and Films for Remarkable Daytime Subambient Radiative Cooling. *ACS Applied Materials & Interfaces* **13**, 21733-21739 (2021). 10.1021/acsami.1c02368

38. Luo C-L*, et al.* Enhanced passive radiative cooling coating with Y2O3 for thermal management of building. *Optical Materials* **138**, 113710 (2023). <https://doi.org/10.1016/j.optmat.2023.113710>

39. Yang X*, et al.* A flexible PDMS@ZrO2 film for highly efficient passive radiative cooling. *Inorganic Chemistry Communications* **151**, 110586 (2023). <https://doi.org/10.1016/j.inoche.2023.110586>

40. Yang X*, et al.* Self-cleaning energy-free PDMS@KL film for daytime radiative cooling. *Materials Letters* **350**, 134831 (2023). <https://doi.org/10.1016/j.matlet.2023.134831>

41. Huang X, Liu D, Li N, Wang J, Zhang Z, Zhong M. Single novel Ca0.5Mg10.5(HPO3)8(OH)3F3 coating for efficient passive cooling in the natural environment. *Solar Energy* **202**, 164-170 (2020). <https://doi.org/10.1016/j.solener.2020.03.103>

42. Huang W*, et al.* Scalable Aqueous Processing-Based Passive Daytime Radiative Cooling Coatings. *Advanced Functional Materials* **31**, 2010334 (2021). <https://doi.org/10.1002/adfm.202010334>

43. Wang S*, et al.* A Versatile Strategy for Concurrent Passive Daytime Radiative Cooling and Sustainable Energy Harvesting. *Small* **20**, 2305706 (2024). <https://doi.org/10.1002/smll.202305706>

44. Son S, Liu Y, Chae D, Lee H. Cross-Linked Porous Polymeric Coating without a Metal-Reflective Layer for Sub-Ambient Radiative Cooling. *ACS Applied Materials & Interfaces* **12**, 57832-57839 (2020). 10.1021/acsami.0c14792

45. Liu C*, et al.* Extreme-environment tolerant superhydrophobic montmorillonite/hollow SiO2 composite coating as building radiative cooler for scale energy conservation. *Colloids and Surfaces A: Physicochemical and Engineering Aspects* **674**, 131972 (2023). <https://doi.org/10.1016/j.colsurfa.2023.131972>

46. Gong Q, Lu L, Chen J, Yin Lau W, Ho Cheung K. A novel aqueous scalable eco-friendly paint for passive daytime radiative cooling in sub-tropical climates. *Solar Energy* **255**, 236-242 (2023). <https://doi.org/10.1016/j.solener.2023.03.033>

47. Liu S*, et al.* A Scalable Microstructure Photonic Coating Fabricated by Roll-to-Roll “Defects” for Daytime Subambient Passive Radiative Cooling. *Nano Letters* **23**, 7767-7774 (2023). 10.1021/acs.nanolett.3c00111

48. Wang J*, et al.* High-Strength Flexible Membrane with Rational Pore Architecture as a Selective Radiator for High-Efficiency Daytime Radiative Cooling. *Advanced Materials Technologies* **7**, 2100528 (2022). <https://doi.org/10.1002/admt.202100528>

49. Song X, Gao Y, Zhang P. A bioinspired and scalable near-ideal broadband coating for radiative thermoregulation. *Journal of Materials Chemistry A* **10**, 22166-22174 (2022). 10.1039/D2TA05353E

50. Li W*, et al.* Scalable and Flexible Multi-Layer Prismatic Photonic Metamaterial Film for Efficient Daytime Radiative Cooling. *Small Methods* **8**, 2301258 (2024). <https://doi.org/10.1002/smtd.202301258>

51. Li B*, et al.* Low-cost and scalable sub-ambient radiative cooling porous films. *Journal of Photonics for Energy* **13**, 015501 (2023).

52. Zhou K*, et al.* Three-Dimensional Printable Nanoporous Polymer Matrix Composites for Daytime Radiative Cooling. *Nano Letters* **21**, 1493-1499 (2021). 10.1021/acs.nanolett.0c04810

53. Zhang Y, Wang T, Mei X, Chen M, Wu L. Ordered Porous Polymer Films for Highly Efficient Passive Daytime Radiative Cooling. *ACS Photonics* **10**, 3124-3132 (2023). 10.1021/acsphotonics.3c00494

54. Song Y, Zhan Y, Li Y, Li J. Scalable fabrication of super-elastic TPU membrane with hierarchical pores for subambient daytime radiative cooling. *Solar Energy* **256**, 151-157 (2023). <https://doi.org/10.1016/j.solener.2023.03.018>

55. Yang X*, et al.* A flexibly hierarchical porous polydimethylsiloxane film for Passive daytime radiative cooling. *Materials Letters* **331**, 133512 (2023). <https://doi.org/10.1016/j.matlet.2022.133512>

56. Cai C*, et al.* Large scalable, anti-ultraviolet, strong cellulose film with well-defined dual-pores for longtime daytime radiative cooling. *Chemical Engineering Journal* **476**, 146668 (2023). <https://doi.org/10.1016/j.cej.2023.146668>

57. Cai C*, et al.* Bioinspired “aerogel grating” with metasurfaces for durable daytime radiative cooling for year-round energy savings. *Nano Energy* **114**, 108625 (2023). <https://doi.org/10.1016/j.nanoen.2023.108625>

58. Zhang K, Mo C, Tang X, Lei X. Hierarchically Porous Cellulose-Based Radiative Cooler for Zero-Energy Food Preservation. *ACS Sustainable Chemistry & Engineering* **11**, 7745-7754 (2023). 10.1021/acssuschemeng.3c00170

59. Zhong S*, et al.* Daytime radiative cooling aerogel with favorable amphiphobic surface properties. *Optical Materials* **142**, 114068 (2023). <https://doi.org/10.1016/j.optmat.2023.114068>

60. Ma B, Cheng Y, Hu P, Fang D, Wang J. Passive Daytime Radiative Cooling of Silica Aerogels. *Nanomaterials* **13**, 467 (2023).

61. Lauster T*, et al.* From Chitosan to Chitin: Bio-Inspired Thin Films for Passive Daytime Radiative Cooling. *Advanced Science* **10**, 2206616 (2023). <https://doi.org/10.1002/advs.202206616>

62. She Y*, et al.* From nature back to nature: Spectrally modified poplar and its all-day passive radiative cooling. *Industrial Crops and Products* **193**, 116242 (2023). <https://doi.org/10.1016/j.indcrop.2023.116242>

63. Zhong H, Zhang P, Li Y, Yang X, Zhao Y, Wang Z. Highly Solar-Reflective Structures for Daytime Radiative Cooling under High Humidity. *ACS Applied Materials & Interfaces* **12**, 51409-51417 (2020). 10.1021/acsami.0c14075

64. Zhou J*, et al.* High-Durable, Radiative-Cooling, and Heat-Insulating Flexible Films Enabled by a Bioinspired Dictyophora-Like Structure. *ACS Applied Materials & Interfaces* **15**, 57514-57524 (2023). 10.1021/acsami.3c14310

65. Wu S*, et al.* Eggshell Biowaste-Derived Flexible and Self-Cleaning Films for Efficient Subambient Daytime Radiative Cooling. *ACS Applied Materials & Interfaces* **15**, 44820-44826 (2023). 10.1021/acsami.3c06296

66. Li M*, et al.* A UV-Reflective Organic–Inorganic Tandem Structure for Efficient and Durable Daytime Radiative Cooling in Harsh Climates. *Small* **19**, 2301159 (2023). <https://doi.org/10.1002/smll.202301159>

67. Gamage S*, et al.* Reflective and transparent cellulose-based passive radiative coolers. *Cellulose* **28**, 9383-9393 (2021). 10.1007/s10570-021-04112-1

68. Jing W*, et al.* Scalable and Flexible Electrospun Film for Daytime Subambient Radiative Cooling. *ACS Applied Materials & Interfaces* **13**, 29558-29566 (2021). 10.1021/acsami.1c05364

69. Jeon S*, et al.* Multifunctional Daytime Radiative Cooling Devices with Simultaneous Light-Emitting and Radiative Cooling Functional Layers. *ACS Applied Materials & Interfaces* **12**, 54763-54772 (2020). 10.1021/acsami.0c16241

70. Wang X*, et al.* Sub-ambient full-color passive radiative cooling under sunlight based on efficient quantum-dot photoluminescence. *Science Bulletin* **67**, 1874-1881 (2022). <https://doi.org/10.1016/j.scib.2022.08.028>

71. IEC. IEC 60584-1:2013. In: *Thermocouples - Part 1: EMF specifications and tolerances*) (2013).

72. IEC. IEC 60751:2022. In: *Industrial platinum resistance thermometers and platinum temperature sensors*) (2022).
